# Supplementary material for: TDR Targets 6: driving drug discovery for human pathogens through intensive chemogenomic data integration
Source: PubMed Central journal article supplement — Nucleic Acids Res. 2019 Nov 4;48(D1):D992–D1005. doi: 10.1093/nar/gkz999 (PMC7145610; doi:10.1093/nar/gkz999), 2019-11-04
Supplement: gkz999_supplemental_file.pdf [file gkz999_supplemental_file.pdf]

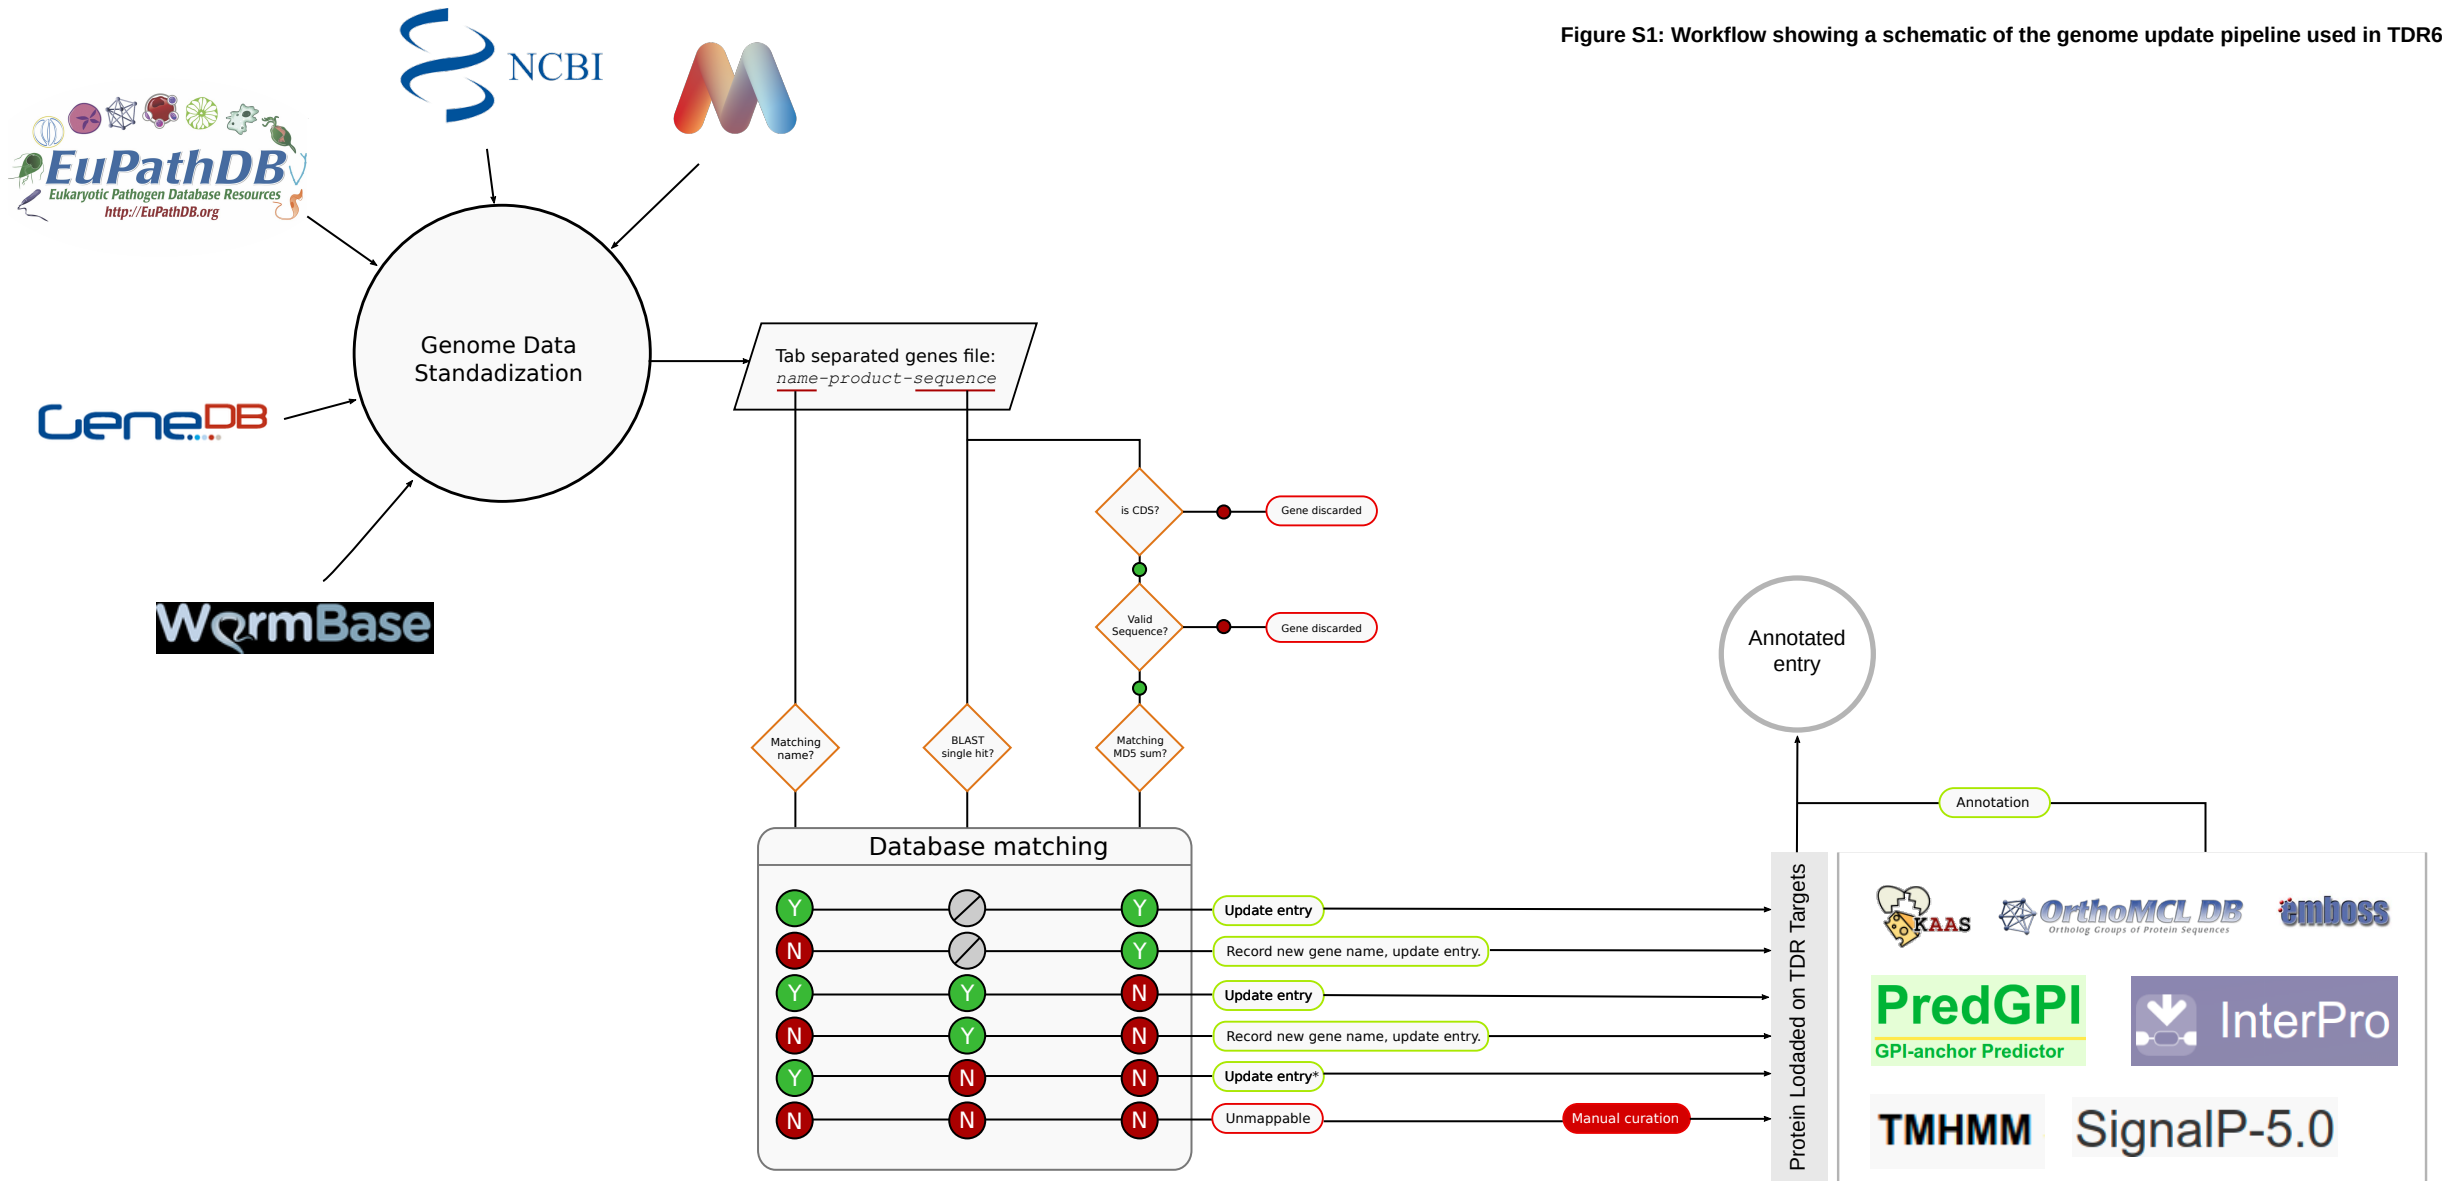

Figure S1: Workflow showing a schematic of the genome update pipeline used in TDR6

**Figure S2: Molecular weight and Polar surface distribution for compounds in the database**

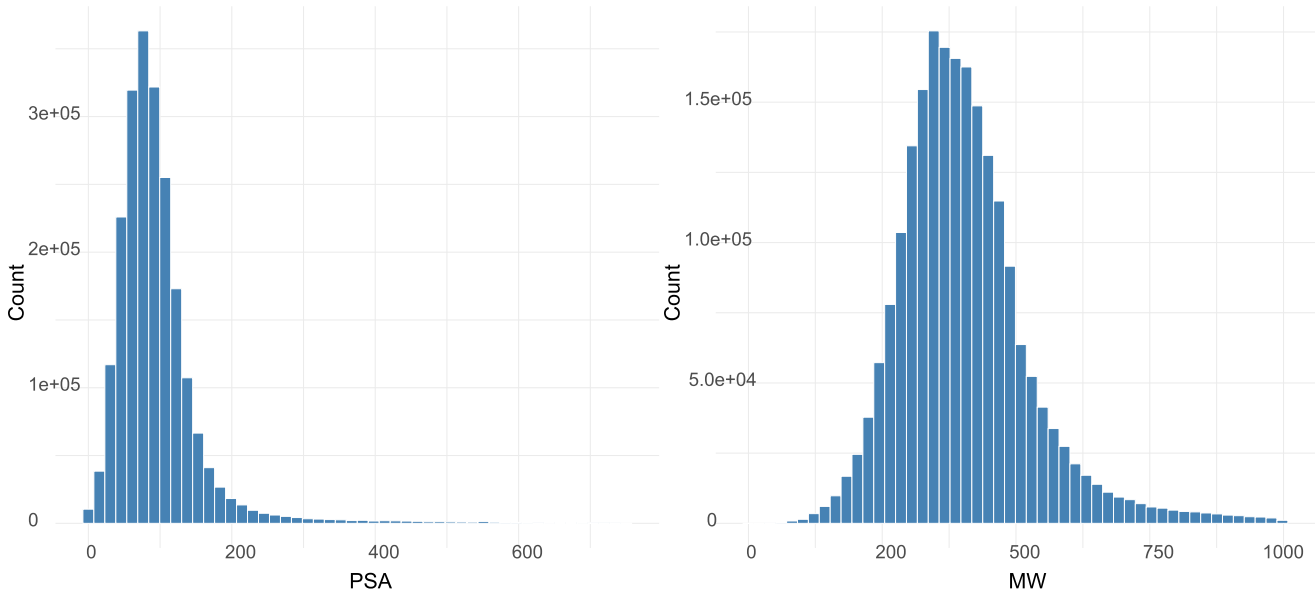

Figure S3: Number of activities by assay type and number of activities per compound in the database

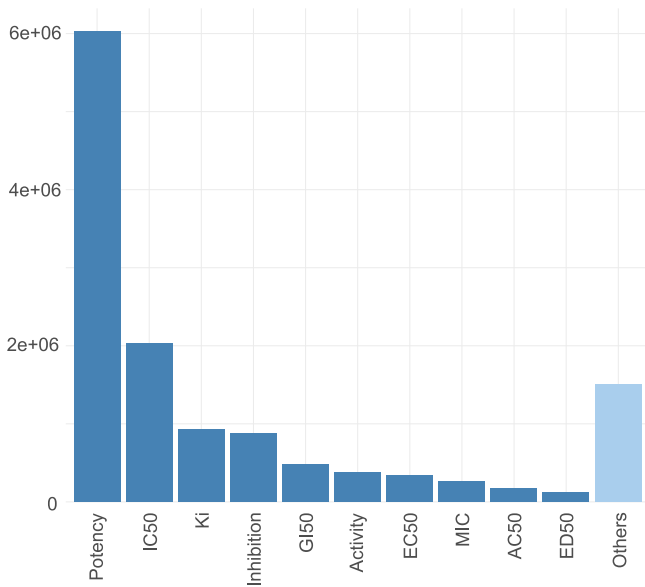

Number of activities per Activity type

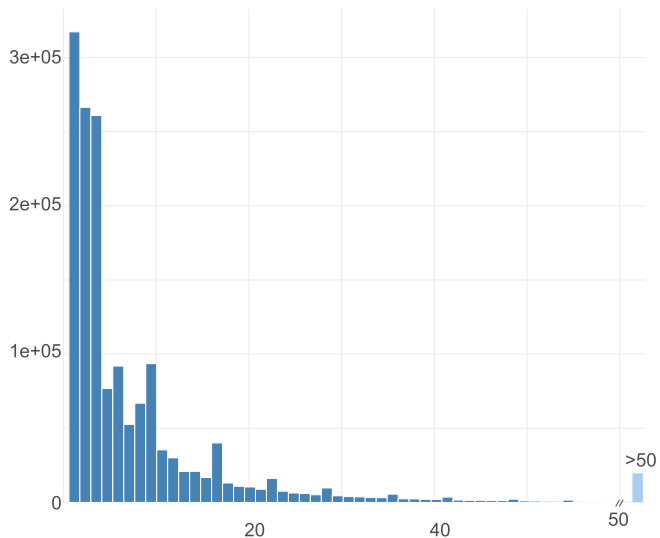

Number of activities per compound

**Table S1: List of species, strains and sources used to populate the database and the chemogenomic repurposing network**

| Type     | Parent Group              | Species                            | Strain             | Source            |
|----------|---------------------------|------------------------------------|--------------------|-------------------|
| Model    | Plant                     | <i>Arabidopsis thaliana</i>        |                    | GenBank           |
| Model    | Helminth                  | <i>Caenorhabditis elegans</i>      |                    | GenBank           |
| Model    | Fungi                     | <i>Candida albicans</i>            |                    | GenBank           |
| Model    | Early Branching Eukaryote | <i>Dictyostelium discoideum</i>    |                    | GenBank           |
| Model    | Arthropoda                | <i>Drosophila melanogaster</i>     |                    | GenBank           |
| Model    | Bacteria                  | <i>Escherichia coli</i>            | K12                | GenBank           |
| Model    | Mammal                    | <i>Homo sapiens</i>                |                    | GenBank           |
| Model    | Mammal                    | <i>Mus musculus</i>                |                    | GenBank           |
| Model    | Plant                     | <i>Oryza sativa</i>                |                    | GenBank           |
| Model    | Fungi                     | <i>Saccharomyces cerevisiae</i>    | S288C              | GenBank           |
| Model    | Helminth                  | <i>Schmidtea mediterranea</i>      | S2F2               | SmedGD            |
| Pathogen | Apicomplexa               | <i>Babesia bovis</i>               | T2Bo               | PiroplasmaDB      |
| Pathogen | Apicomplexa               | <i>Cryptosporidium hominis</i>     | TU502              | CryptoDB          |
| Pathogen | Apicomplexa               | <i>Cryptosporidium parvum</i>      | Iowa II            | CryptoDB          |
| Pathogen | Early Branching Eukaryote | <i>Entamoeba histolytica</i>       | HM-1:IMSS          | AmoebaDB          |
| Pathogen | Helminth                  | <i>Giardia lamblia</i>             | isolate WB         | GiardiaDB         |
| Pathogen | Trypanosomatid            | <i>Leishmania braziliensis</i>     | MHOM/BR/75/M2903   | TriTrypDB         |
| Pathogen | Trypanosomatid            | <i>Leishmania donovani</i>         | BPK28              | TriTrypDB         |
| Pathogen | Trypanosomatid            | <i>Leishmania infantum</i>         | JPCM5              | TriTrypDB         |
| Pathogen | Trypanosomatid            | <i>Leishmania major</i>            | Friedlin           | TriTrypDB         |
| Pathogen | Trypanosomatid            | <i>Leishmania mexicana</i>         | MHOM/GT/2001/U1103 | TriTrypDB         |
| Pathogen | Bacteria                  | <i>Mycobacterium leprae</i>        | TN                 | GenoList          |
| Pathogen | Bacteria                  | <i>Mycobacterium tuberculosis</i>  | H37Rv              | GenoList          |
| Pathogen | Apicomplexa               | <i>Plasmodium berghei</i>          | ANKA               | PlasmoDB          |
| Pathogen | Apicomplexa               | <i>Plasmodium falciparum</i>       | 3D7                | PlasmoDB          |
| Pathogen | Apicomplexa               | <i>Plasmodium knowlesi</i>         | H                  | PlasmoDB          |
| Pathogen | Apicomplexa               | <i>Plasmodium vivax</i>            | Sal-1              | PlasmoDB          |
| Pathogen | Apicomplexa               | <i>Plasmodium yoelii</i>           | 17XNL              | PlasmoDB          |
| Pathogen | Apicomplexa               | <i>Theileria parva</i>             | Muguga             | PiroplasmaDB      |
| Pathogen | Apicomplexa               | <i>Toxoplasma gondii</i>           | ME49               | ToxoDB            |
| Pathogen | Early Branching Eukaryote | <i>Trichomonas vaginalis</i>       | G3                 | TrichDB           |
| Pathogen | Trypanosomatid            | <i>Trypanosoma brucei</i>          | TREU927            | TriTrypDB         |
| Pathogen | Trypanosomatid            | <i>Trypanosoma cruzi</i>           | CL Brener          | TriTrypDB         |
| Pathogen | Apicomplexa               | <i>Neospora caninum</i>            | Liverpool          | ToxoDB            |
| Pathogen | Trypanosomatid            | <i>T. brucei gambiense</i>         | DAL972             | TriTrypDB         |
| Pathogen | Trypanosomatid            | <i>Trypanosoma congolense</i>      | IL3000             | TriTrypDB         |
| Pathogen | Bacteria                  | <i>Chlamydia trachomatis</i>       | D/UW-3/CX          | GenBank           |
| Pathogen | Helminth                  | <i>Onchocerca volvulus</i>         | Cameroon           | Wormbase Parasite |
| Pathogen | Helminth                  | <i>Loa Loa</i>                     | Cameroon           | GenBank           |
| Pathogen | Bacteria                  | <i>Mycobacterium ulcerans</i>      | Agy99              | GenBank           |
| Pathogen | Bacteria                  | <i>Wolbachia Brugia malayi</i>     | TRS                | GenBank           |
| Pathogen | Helminth                  | <i>Echinococcus granulosus</i>     | G1                 | GeneDB            |
| Pathogen | Helminth                  | <i>Echinococcus multilocularis</i> | Java               | GeneDB            |
| Pathogen | Helminth                  | <i>Schistosoma japonicum</i>       | China/Anhui        | GeneDB            |
| Pathogen | Helminth                  | <i>Brugia malayi</i>               | TRS                | GenBank           |
| Pathogen | Helminth                  | <i>Schistosoma mansoni</i>         | Puerto Rico        | GenBank           |
| Pathogen | Bacteria                  | <i>Treponema pallidum</i>          | Nichols            | GenBank           |
